# Supplementary material
Source: HighWire-hosted journal article supplement (http://thorax.bmjjournals.com/highwire/filestream/174016/field_highwire_adjunct_files/0/62121102webonlyfigs.pdf)
Supplement: 62121102webonlyfigs.pdf [file 62121102webonlyfigs.pdf]

Figure 1

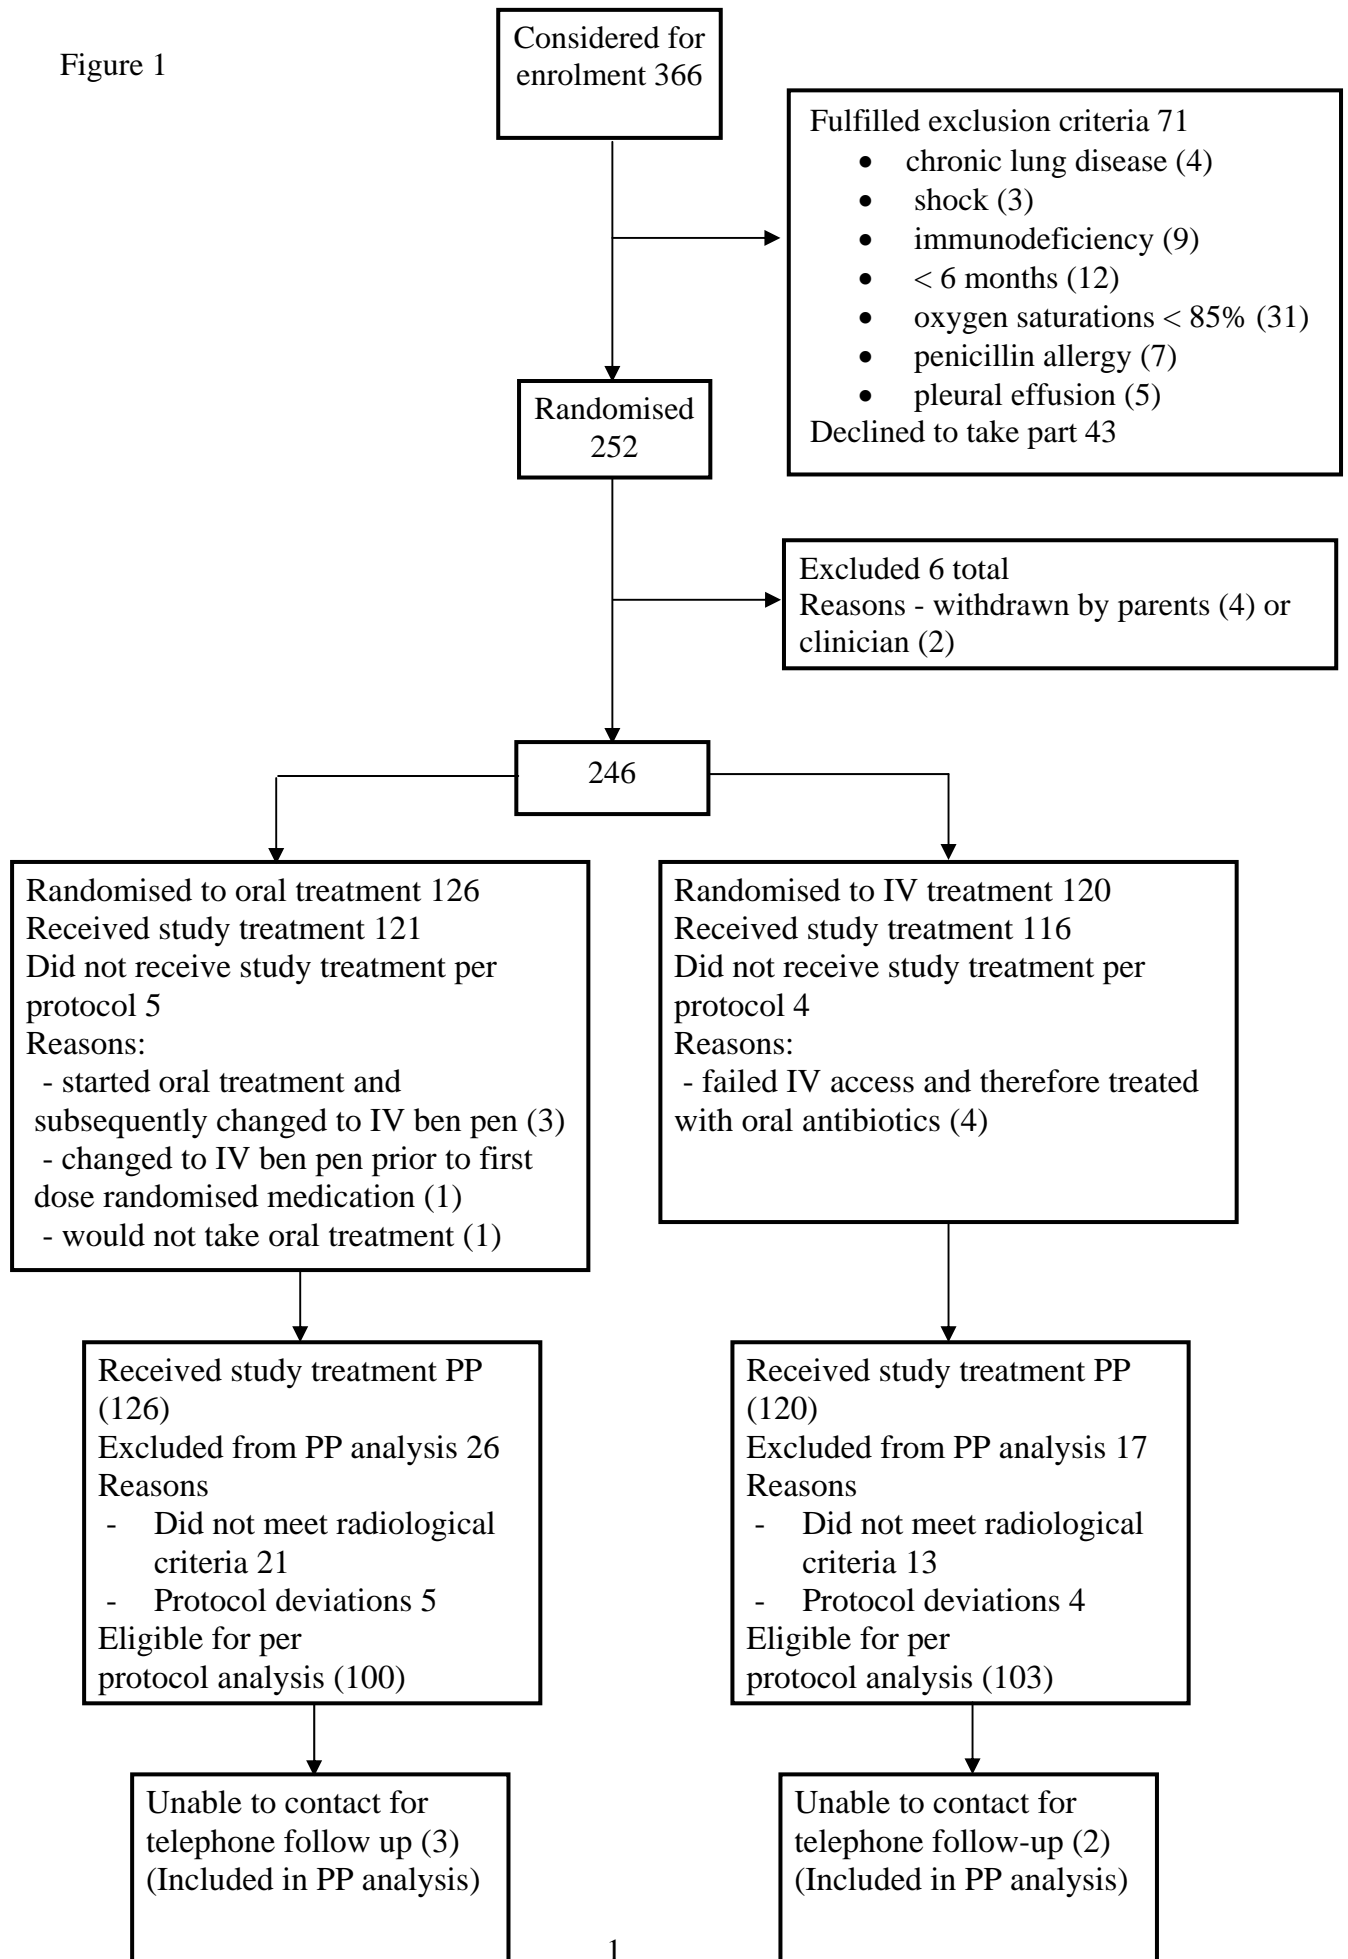

Figure 2

Survival curve for the time for the temperature to be  $< 38^{\circ}\text{C}$  for 24 continuous hours and oxygen requirement to cease in the 2 treatment groups (censored data, per protocol analysis)

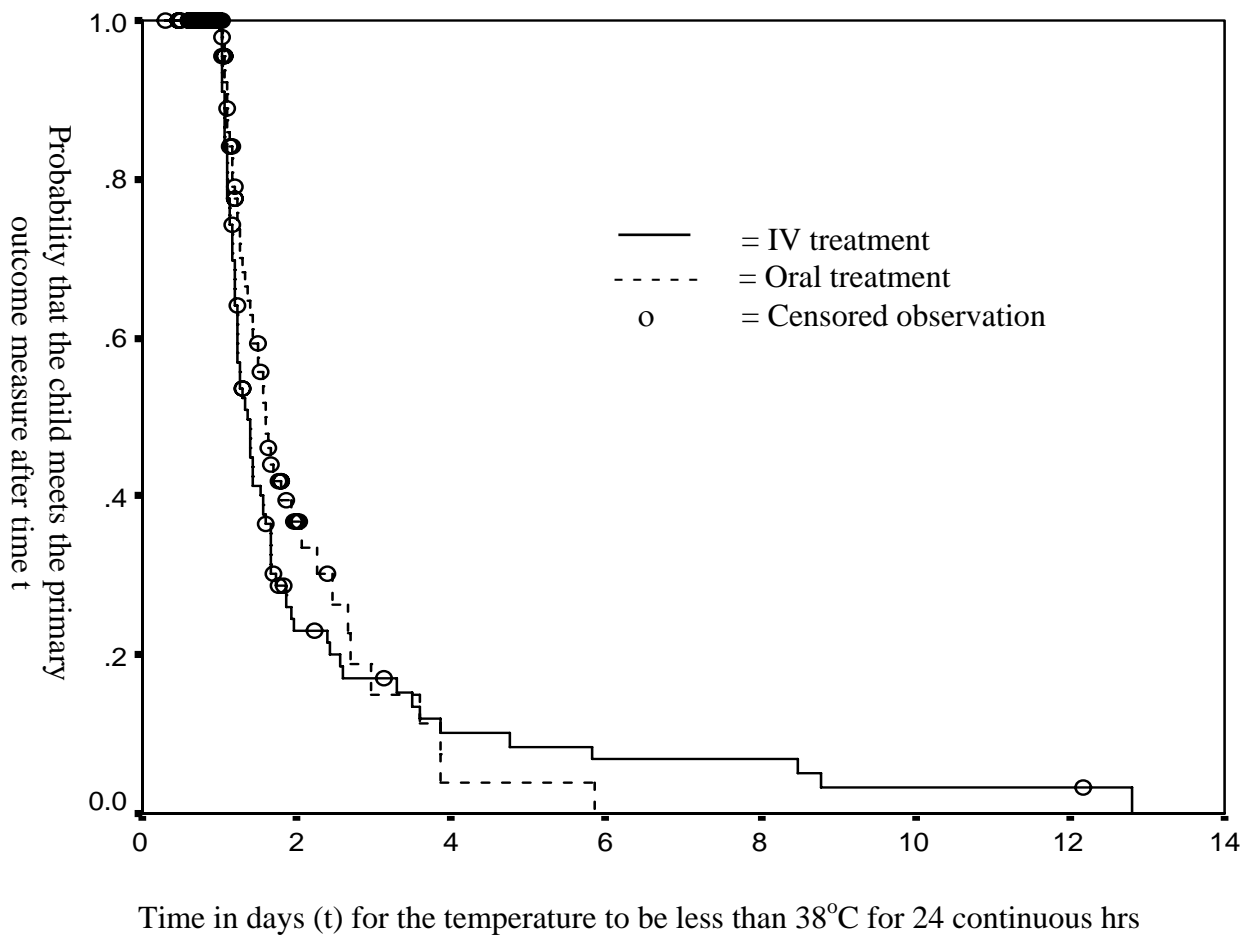

Per protocol analysis  $p = 0.031$

Figure 3

Survival curve for the time for the temperature to be  $< 38^{\circ}\text{C}$  for 24 continuous hours and oxygen requirement to cease in the 2 treatment groups (no censored data, per protocol analysis)

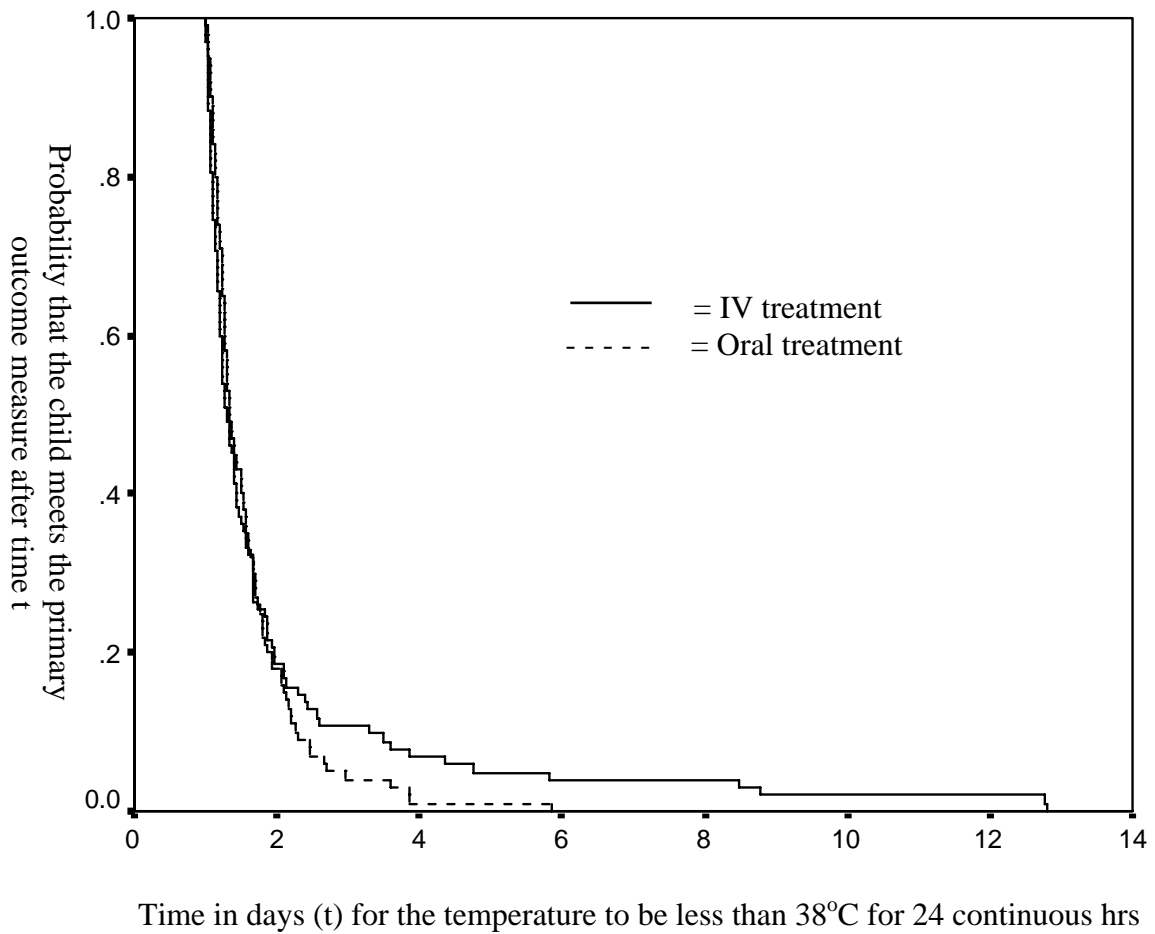

Per protocol analysis  $p= 0.001$
